# Supplementary material for: Structural Studies of Piperine Inclusion Complexes in Native and Derivative β-Cyclodextrins
Source: MDPI journal article supplement (doi:10.3390/biom12121762), 2022-11-26
Supplement: s1 [file s1]

Supplementary material

# Structural Studies of Piperine Inclusion Complexes in Native and Derivative $\beta$ -Cyclodextrins

Elias Christoforides <sup>1</sup>, Athena Andreou <sup>2</sup>, Andreas Papaioannou <sup>1</sup> and Kostas Bethanis <sup>1,\*</sup>

<sup>1</sup> Physics Laboratory, Department of Biotechnology, Agricultural University of Athens, 75 Iera Odos, Athens 11855, Greece

<sup>2</sup> Genetics Laboratory, Department of Biotechnology, Agricultural University of Athens, 75 Iera Odos, Athens 11855, Greece

\* Correspondence: kbeth@aia.gr; Tel.: +302105294211

## Contents

|                                                                                                                                                                                                                                                                                                                                                                                                                                                      |    |
|------------------------------------------------------------------------------------------------------------------------------------------------------------------------------------------------------------------------------------------------------------------------------------------------------------------------------------------------------------------------------------------------------------------------------------------------------|----|
| <b>Figure S1.</b> The solubility profile of pure piperine in an equimolar water: methanol solution (n=3) .....                                                                                                                                                                                                                                                                                                                                       | 2  |
| <b>Figure S2.</b> The distances and angles as defined in Tables S2-S4. In particular the following are presented: (a) d=O4n...O4(n+1) distances; (b) dK=distances of the approximate center K of the O4n heptagon from the O4n atoms; (c) dev=deviations of the O4n atoms from their least-squares plane; (d) $\phi$ =O4(n-1)...O4n ... O4(n+1) angles; (e) $\phi$ K=O4n...K...O4(n+1) angles. All distances are given in Å and angles in (°). ..... | 4  |
| <b>Figure S3.</b> RMSD to first frame vs time plots for the 4 host and two guest molecules in the supramolecular ensemble of PN/ $\beta$ -CD .....                                                                                                                                                                                                                                                                                                   | 5  |
| <b>Figure S4.</b> Number of H-bonds between hydroxyls of the wide rims of adjacent PN/ $\beta$ -CD complex units within the same channel. ....                                                                                                                                                                                                                                                                                                       | 5  |
| <b>Figure S5.</b> H-H close contacts between guest's (PN1) H14, H17 and H18 atoms and host's ( $\beta$ -CD3) H3 atoms of specific glucose residues (G1, G2, G3, G4, G5 and G6). .....                                                                                                                                                                                                                                                                | 6  |
| <b>Figure S6.</b> H-H close contacts between guest's (PN1) H14, H17 and H18 atoms and host's ( $\beta$ -CD3) H5 atoms of residues G1, G2, G3, G4, G5 and G6. ....                                                                                                                                                                                                                                                                                    | 7  |
| <b>Figure S7.</b> Plots of contacts between PN1 and PN2 guests and $\beta$ -CD3/ $\beta$ -CD4 and $\beta$ -CD1/ $\beta$ -CD2 host duets, respectively in PN/ $\beta$ -CD complex case. ....                                                                                                                                                                                                                                                          | 8  |
| <b>Figure S8.</b> Number of H-bonds between hosts and guests in PN/ $\beta$ -CD complex case. ....                                                                                                                                                                                                                                                                                                                                                   | 8  |
| <b>Table S1:</b> Main intramolecular interactions present in the crystal structures of PN/ $\beta$ -CD, PN/DM- $\beta$ -CD and PN/TM- $\beta$ -CD inclusion complexes. ....                                                                                                                                                                                                                                                                          | 9  |
| <b>Table S2.</b> Conformational characteristics of the two $\beta$ -CD host molecules in the PN/ $\beta$ -CD structure .....                                                                                                                                                                                                                                                                                                                         | 12 |
| <b>Table S3.</b> Conformational characteristics of the DM- $\beta$ -CD host molecule in the PN/DM- $\beta$ -CD structure. ....                                                                                                                                                                                                                                                                                                                       | 13 |
| <b>Table S4.</b> Conformational characteristics of the two TM- $\beta$ -CD host molecules in the PN/TM- $\beta$ -CD structure .....                                                                                                                                                                                                                                                                                                                  | 13 |
| <b>Table S5.</b> H bond analysis for the two encapsulated PN molecules (PN_1 and PN_2) in their complex with four $\beta$ -CDs during the 12 ns MD simulation. ....                                                                                                                                                                                                                                                                                  | 15 |

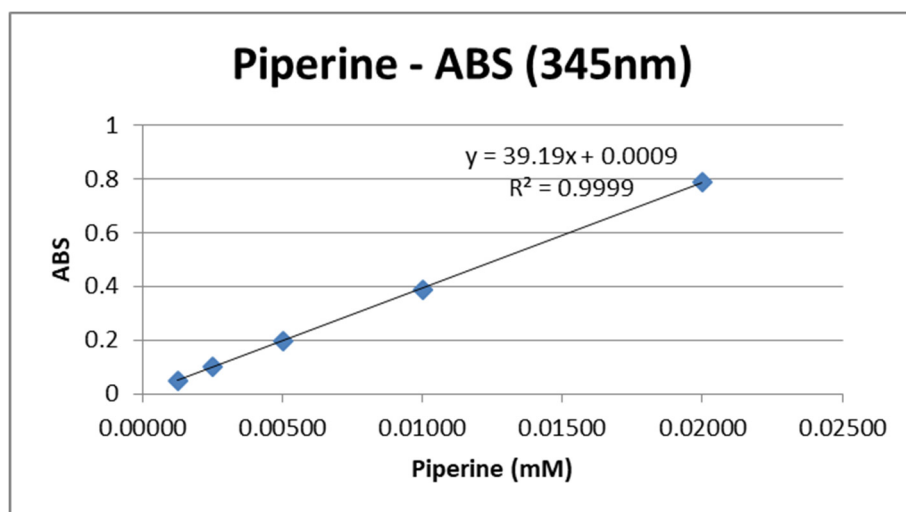

**Figure S1.** The solubility profile of pure piperine in an equimolar water: methanol solution (n=3).

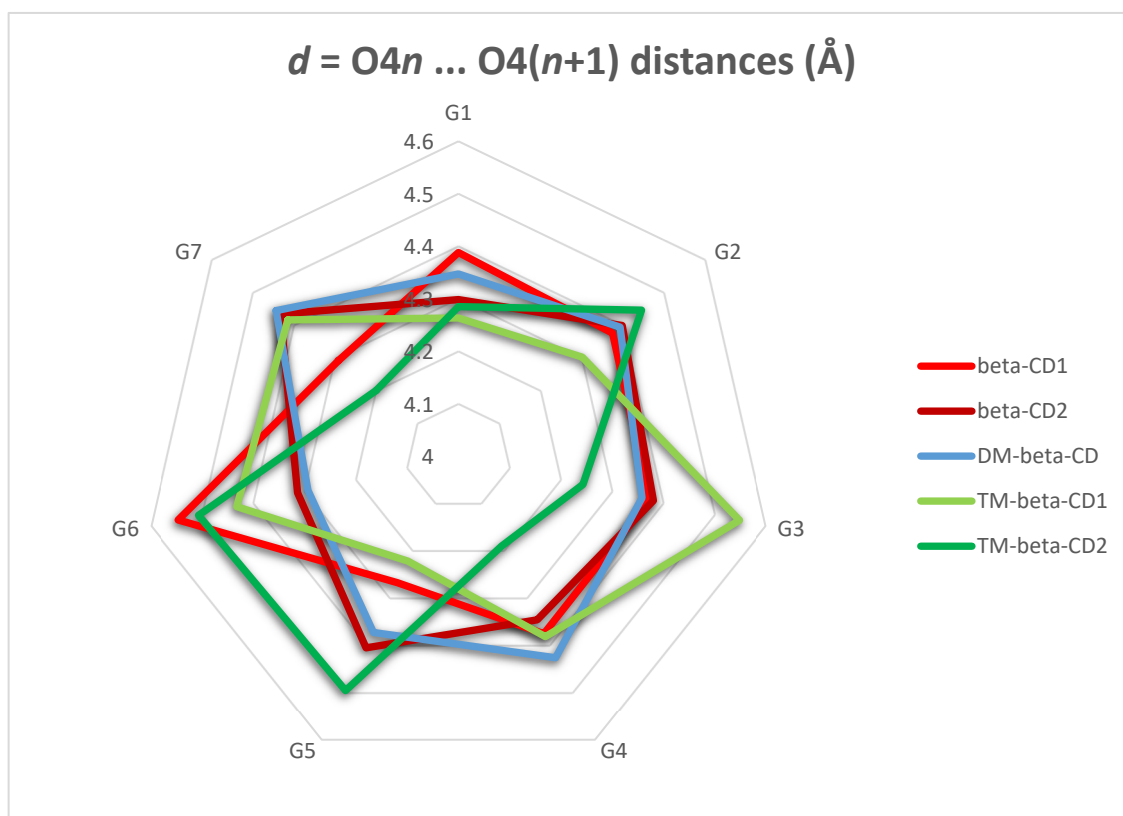

(a)

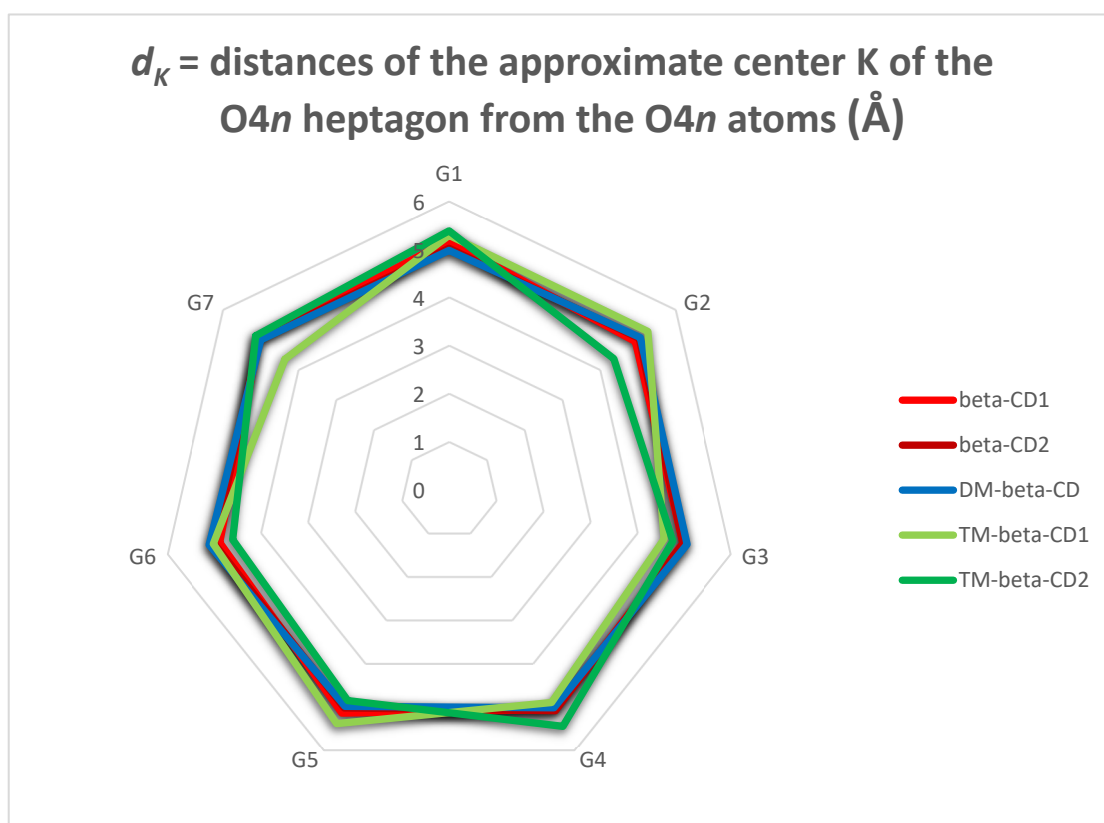

(b)

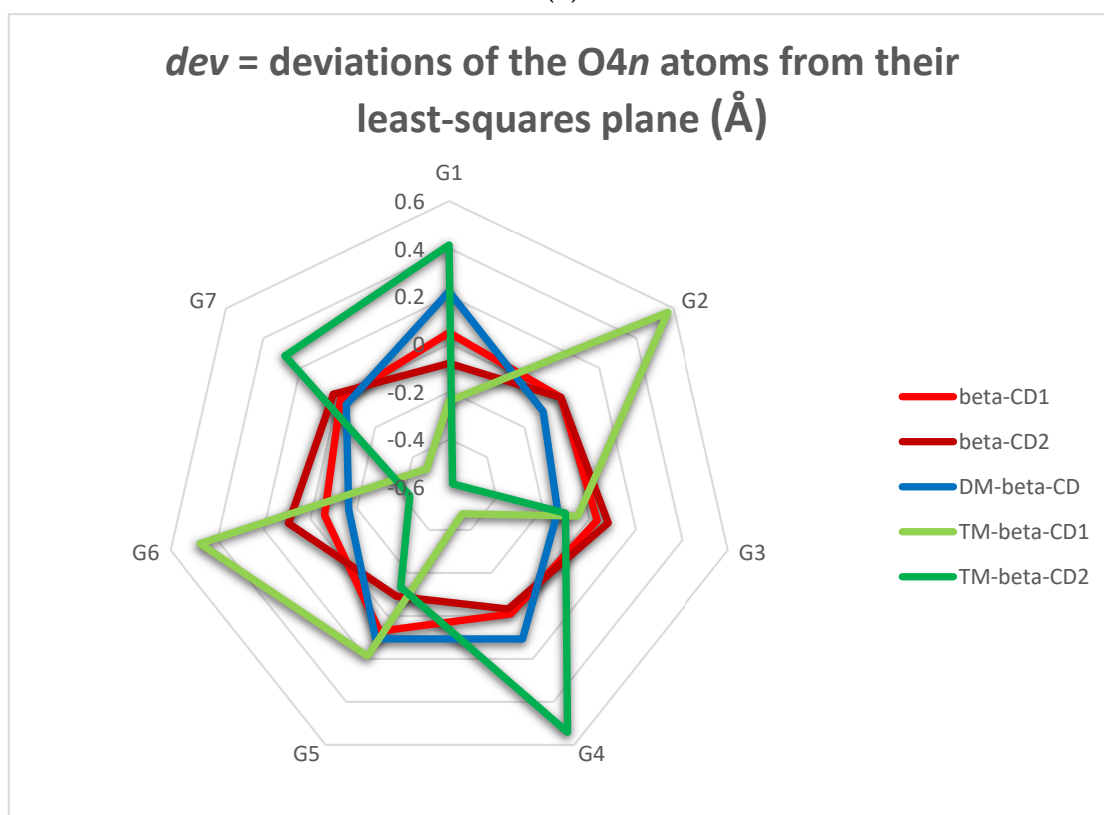

(c)

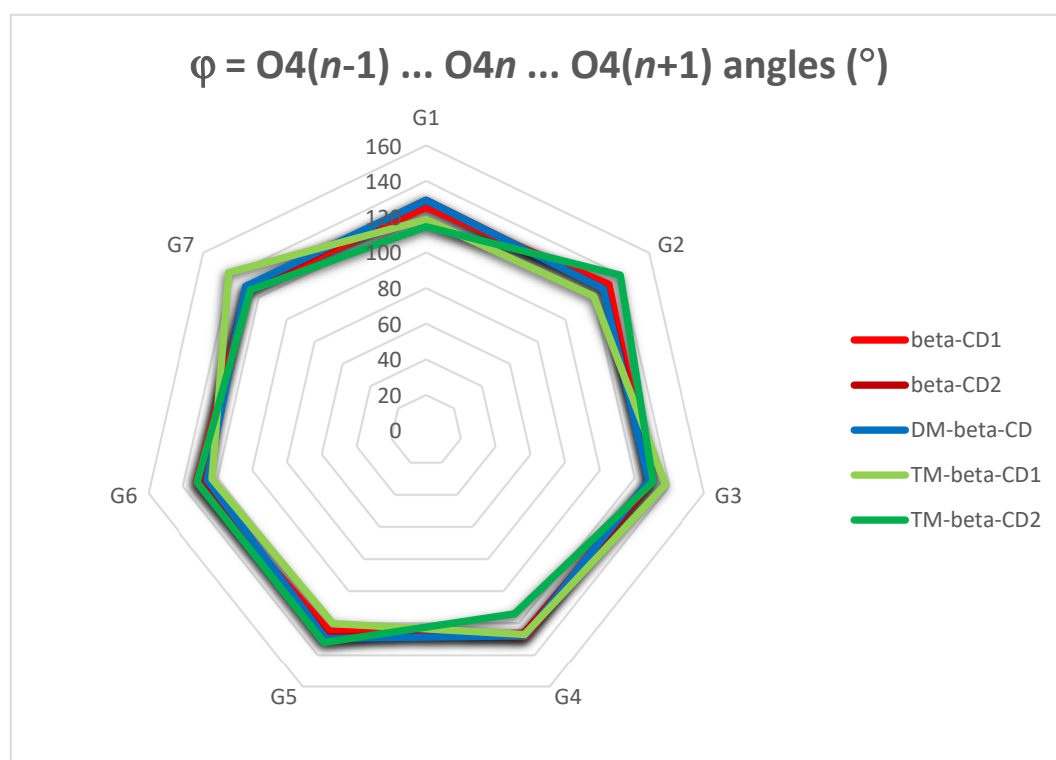

(d)

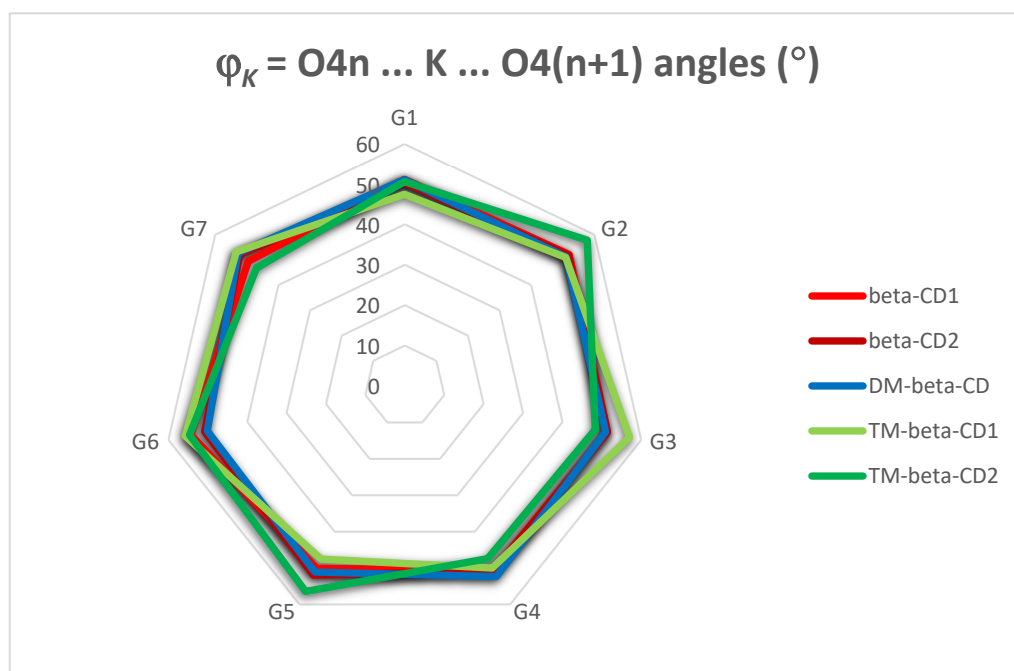

(e)

**Figure S2.** The distances and angles as defined in Tables S2-S4. In particular the following are presented: (a)  $d = \text{O4}n \dots \text{O4}(n+1)$  distances; (b)  $d_K$  = distances of the approximate center  $K$  of the  $\text{O4}n$  heptagon from the  $\text{O4}n$  atoms; (c)  $\text{dev}$  = deviations of the  $\text{O4}n$  atoms from their least-squares plane; (d)  $\varphi = \text{O4}(n-1) \dots \text{O4}n \dots \text{O4}(n+1)$  angles; (e)  $\varphi_K = \text{O4}n \dots K \dots \text{O4}(n+1)$  angles. All distances are given in Å and angles in ( $^{\circ}$ ).

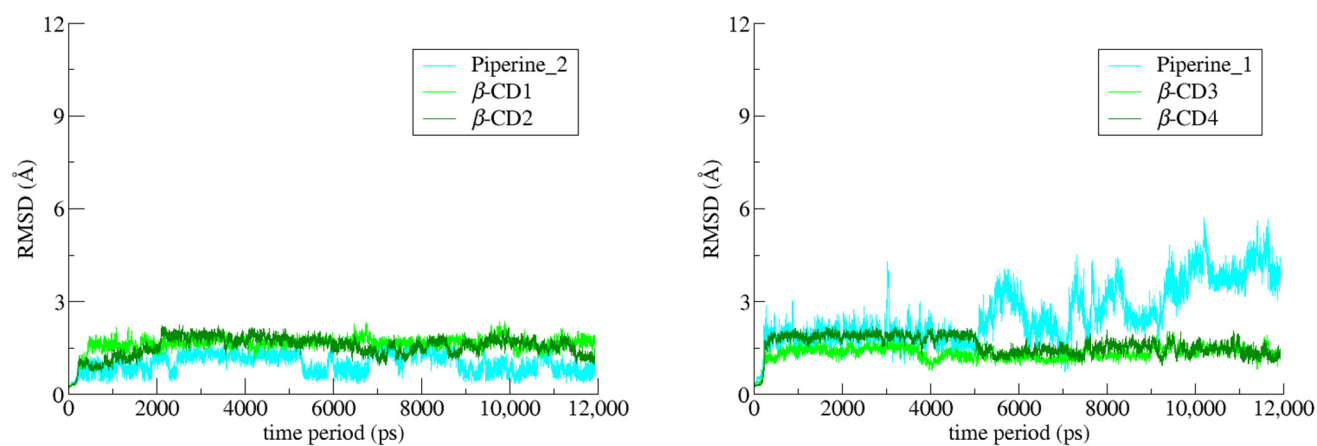

**Figure S3.** RMSD to first frame vs time plots for the 4 host and two guest molecules in the supramolecular ensemble of PN/ $\beta$ -CD.

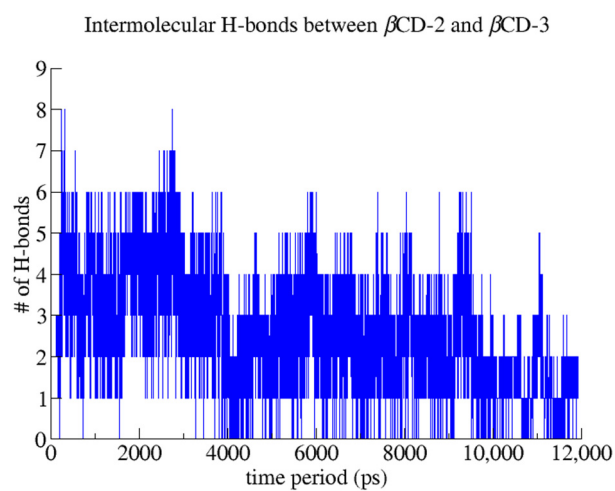

**Figure S4.** Number of H-bonds between hydroxyls of the wide rims of adjacent PN/ $\beta$ -CD complex units within the same channel.

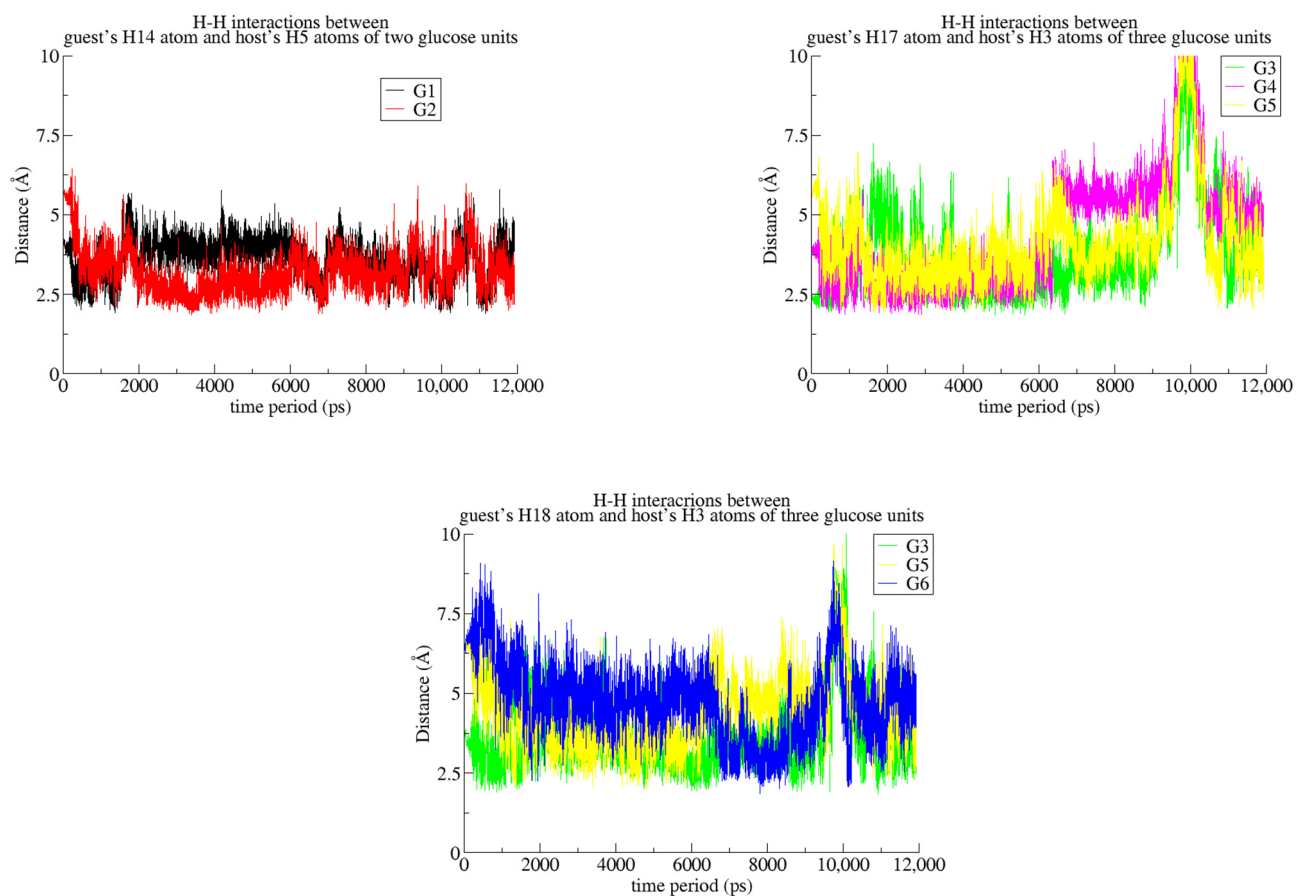

**Figure S5.** H-H close contacts between guest's (PN1) H14, H17 and H18 atoms and host's ( $\beta$ -CD3) H3 atoms of specific glucose residues (G1, G2, G3, G4, G5 and G6).

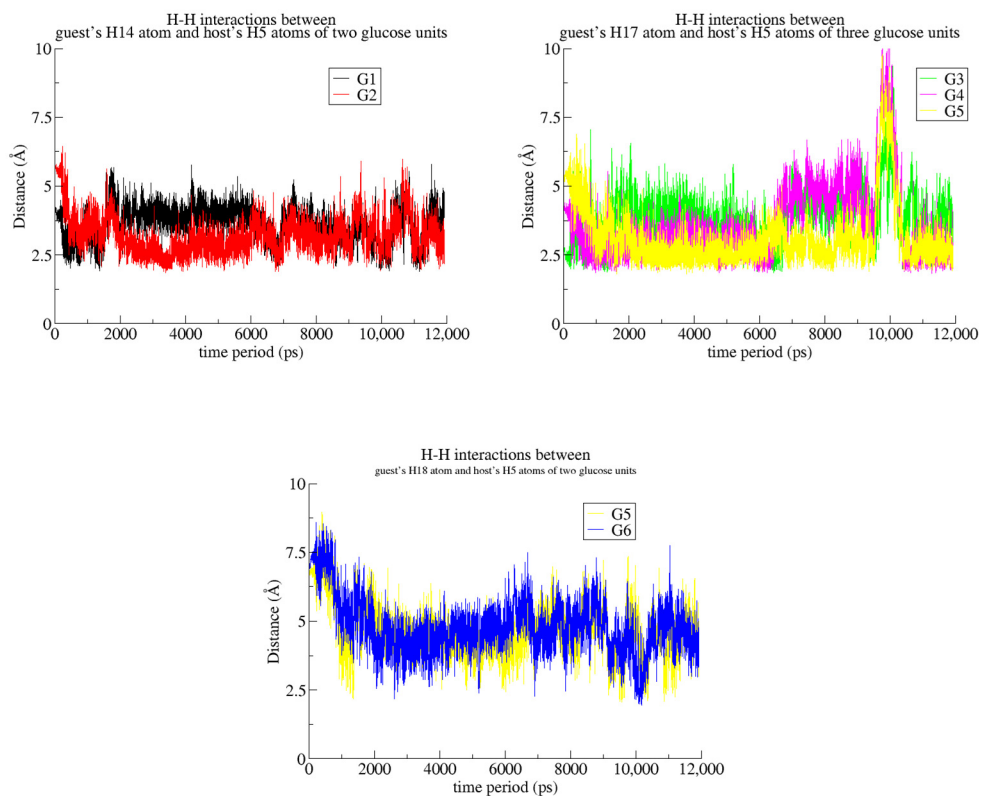

**Figure S6.** H-H close contacts between guest's (PN1) H14, H17 and H18 atoms and host's ( $\beta$ -CD3) H5 atoms of residues G1, G2, G3, G4, G5 and G6.

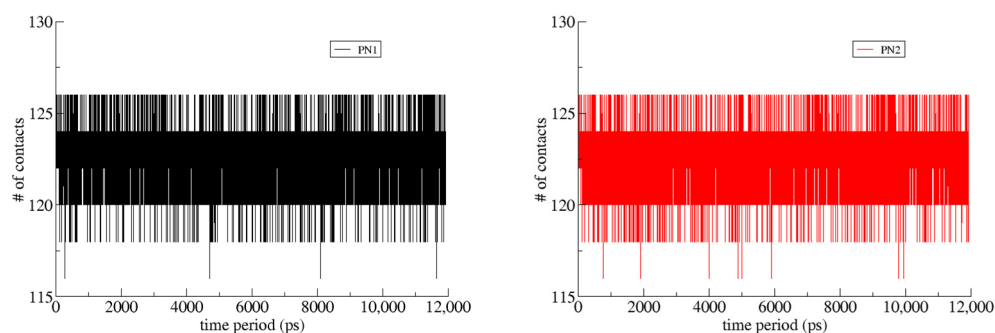

**Figure S7.** Plots of contacts between PN1 and PN2 guests and  $\beta$ -CD3/ $\beta$ -CD4 and  $\beta$ -CD1/ $\beta$ -CD2 host duets, respectively in PN/ $\beta$ -CD complex case.

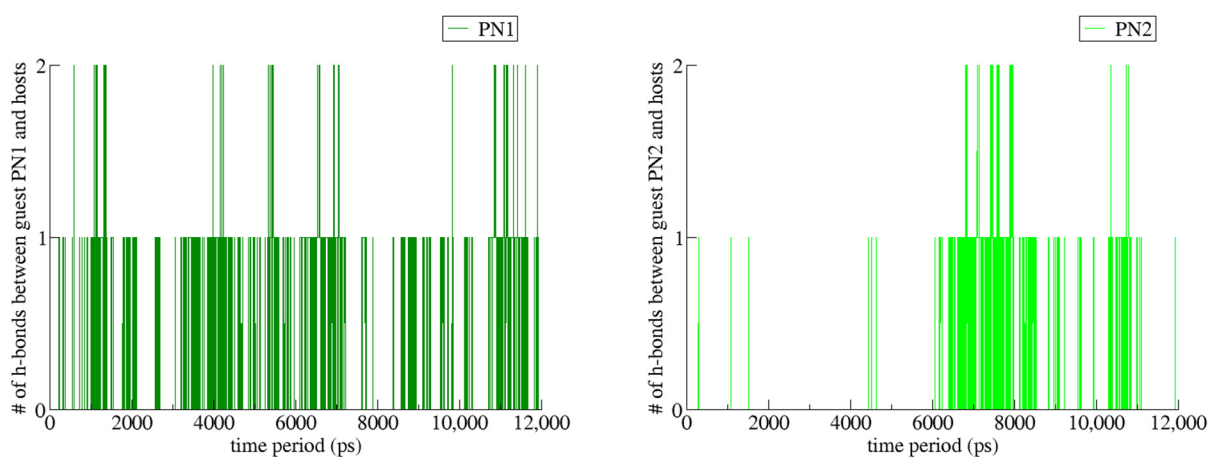

**Figure S8.** Number of H-bonds between hosts and guests in PN/ $\beta$ -CD complex case.



**Table S1:** Main intramolecular interactions present in the crystal structures of PN/ $\beta$ -CD, PN/DM- $\beta$ -CD and PN/TM- $\beta$ -CD inclusion complexes.

**a1. Main Hydrogen Bonds in PN/ $\beta$ -CD case**

| Donor---Hydrogen...Acceptor | Don--Hyd [Å] | Hyd--Acc [Å] | Don--Acc [Å] | D--H----A |
|-----------------------------|--------------|--------------|--------------|-----------|
| O31A---H31L...O22A          | 0.84         | 2.08         | 2.868        | 157.2°    |
| O61A---H61O...OW5           | 0.84         | 2.05         | 2.853        | 159.6°    |
| O22A---H22D...OW3P_a        | 0.84         | 1.94         | 2.738        | 159.4°    |
| O23A---H23B...OW18_a        | 0.84         | 1.75         | 2.580        | 170.0°    |
| O33A---H33N...OW6           | 0.84         | 1.95         | 2.787        | 178.4°    |
| O63A---H63I...OW1           | 0.84         | 1.89         | 2.727        | 175.0°    |
| O34A---H34J...O25A          | 0.84         | 1.91         | 2.743        | 172.5°    |
| O64A---H64U...OW13          | 0.84         | 2.05         | 2.860        | 163.4°    |
| O36A---H36B...O27A          | 0.84         | 1.85         | 2.683        | 173.2°    |
| O66A---H66X...OW9           | 0.84         | 2.48         | 3.277        | 158.3°    |
| O27A---H27C...OW8           | 0.84         | 1.80         | 2.637        | 172.8°    |
| O37A---H37B...O21A          | 0.84         | 2.03         | 2.854        | 167.7°    |
| O67A---H67K...O61B          | 0.84         | 1.88         | 2.721        | 175.0°    |
| O31B---H31C...O22B          | 0.84         | 2.03         | 2.780        | 147.8°    |
| O61B---H61E...OW16          | 0.84         | 1.93         | 2.691        | 149.6°    |
| O62B---H62E...OW9           | 0.84         | 2.19         | 2.874        | 139.2°    |
| O23B---H23C...O32B          | 0.84         | 1.96         | 2.772        | 162.7°    |
| O34B---H34C...O25B          | 0.84         | 1.98         | 2.814        | 171.1°    |
| O64B---H64E...OW13          | 0.84         | 2.04         | 2.842        | 159.1°    |
| O35B---H35D...O26B          | 0.84         | 2.02         | 2.843        | 167.0°    |
| O66B---H66E...O63A          | 0.84         | 1.94         | 2.768        | 170.9°    |
| O27B---H27D...O36B          | 0.84         | 1.92         | 2.739        | 164.4°    |
| O37B---H37C...O21B          | 0.84         | 2.04         | 2.770        | 145.5°    |

**a2. Other host – guest or guest-guest interactions in PN/ $\beta$ -CD case**

| Atoms                                                                    | Distance [Å] | Angle (°) | Type of interaction |
|--------------------------------------------------------------------------|--------------|-----------|---------------------|
| <b>PN1</b>                                                               |              |           |                     |
| HAEB – OAC <sub>(x,y,-1+z)</sub><br>CAE-HAEB – OAC <sub>(x,y,-1+z)</sub> | 1.889        | 162.21°   | C-H...O interaction |
| HAEB – HAUB <sub>(x,y,-1+z)</sub>                                        | 2.285        |           | H-H interaction     |
| HAFA – H53B                                                              | 2.344        |           | H-H interaction     |
| HAFB – H52B                                                              | 2.349        |           | H-H interaction     |
| HAIA-H56B                                                                | 2.239        |           | H-H interaction     |
| HAIA-O46B<br>CAI- HAIA-O46B                                              | 2.682        | 153.11°   | C-H...O interaction |
| HAKB-O65A<br>CAK- HAKB-O65A                                              | 2.583        | 141.31°   | C-H...O interaction |
| HAR-H53A                                                                 | 2.338        |           | H-H interaction     |
| HAS-H32A                                                                 | 2.327        |           | H-H interaction     |
| H36A-OAB<br>C36A- H36A-OAB                                               | 2.457        | 125.92°   | C-H...O interaction |
| H37A-OAB<br>C37A- H37A-OAB                                               | 2.637        | 151.87°   | C-H...O interaction |
| HAUA-H32C <sub>(x,y,1+z)</sub>                                           | 2.318        |           | H-H interaction     |
| HAUA-O32B <sub>(x,y,1+z)</sub><br>CAU-HAUA-O32B <sub>(x,y,1+z)</sub>     | 2.389        | 159.76°   | C-H...O interaction |
| HAUB-H33B <sub>(x,y,1+z)</sub>                                           | 2.130        |           | H-H interaction     |
| <b>PN2</b>                                                               |              |           |                     |
| HAUA-HAEA <sub>(x,y,-1+z)</sub>                                          | 2.256        |           | H-H interaction     |
| HAUA-HAIB <sub>(x,y,-1+z)</sub>                                          | 1.958        |           | H-H interaction     |

|           |       |  |                 |
|-----------|-------|--|-----------------|
| HAT-H34B  | 2.091 |  | H-H interaction |
| HAR-H57B  | 2.184 |  | H-H interaction |
| HAKB-H54A | 2.311 |  | H-H interaction |
| HAIA-H55A | 2.383 |  | H-H interaction |

**b. Other host – guest interactions in PN/DM- $\beta$ -CD case**

| Atoms                | Distance [Å] | Angle (°) | Type of interaction |
|----------------------|--------------|-----------|---------------------|
| HAT-O41<br>C-HAT-O41 | 2.646        | 175.53°   | C-H...O interaction |
| HAP-O44<br>C-HAP-O44 | 2.537        | 157.76°   | C-H...O interaction |

**c. Other host – guest interactions in PN/TM- $\beta$ -CD case**

| Atoms                     | Distance [Å] | Angle (°) | Type of interaction |
|---------------------------|--------------|-----------|---------------------|
| HAS – H55B                | 2.243        |           | H-H interaction     |
| HAQ – H62C                | 2.294        |           | H-H interaction     |
| HAI2 – H71F               | 1.954        |           | H-H interaction     |
| HAF1 –H54A                | 2.225        |           | H-H interaction     |
| HAF2-H97B                 | 2.29         |           | H-H interaction     |
| HAE1-H57A                 | 2.182        |           | H-H interaction     |
| HAE1-O76A<br>C- HAE1-O76A | 2.656        | 150.03°   | C-H...O interaction |

**Table S2.** Conformational characteristics of the two  $\beta$ -CD host molecules in the PN/ $\beta$ -CD structure.

| Glucose unit         | ( <i>n</i> = 1) | ( <i>n</i> = 2) | ( <i>n</i> = 3) | ( <i>n</i> = 4) | ( <i>n</i> = 5) | ( <i>n</i> = 6) | ( <i>n</i> = 7) |
|----------------------|-----------------|-----------------|-----------------|-----------------|-----------------|-----------------|-----------------|
| <b>Host A</b>        |                 |                 |                 |                 |                 |                 |                 |
| <i>d</i>             | 4.3881(5)       | 4.3757(5)       | 4.3730(5)       | 4.3757(4)       | 4.2678(5)       | 4.5479(5)       | 4.2921(4)       |
| $\varphi$            | 125.293(5)      | 131.385(6)      | 128.580(6)      | 128.873(6)      | 125.446(8)      | 132.485(5)      | 127.797(8)      |
| <i>d<sub>K</sub></i> | 5.1833(6)       | 4.9509(5)       | 4.9852(5)       | 5.0623(6)       | 5.1439(6)       | 4.8944(4)       | 5.0548(6)       |
| $\varphi_K$          | 51.253(7)       | 52.256(5)       | 51.593(7)       | 50.766(5)       | 50.245(7)       | 54.373(7)       | 49.552(5)       |
| <i>dev</i>           | 0.047316        | 0.00044197      | 0.037446        | -0.0057490      | 0.073491        | -0.062718       | -0.0153357      |
|                      | (6)             | (8)             | (4)             | (7)             | (9)             | (7)             | (18)            |
| $\tau$               | 14.452(2)       | 7.4592(12)      | 9.6548(14)      | 10.5058(17)     | 8.2666(13)      | 1.8711(3)       | 9.4593(14)      |
| $\tau_i$             | -60.469(8)      | -64.306(7)      | -71.092(8)      | -64.506(8)      | 64.944(7)       | -62.546(8)      | 64.928(7)       |
| <i>C</i>             | <i>gg</i>       | <i>gg</i>       | <i>gg</i>       | <i>gg</i>       | <i>gt</i>       | <i>gg</i>       | <i>gt</i>       |
| <b>Host B</b>        |                 |                 |                 |                 |                 |                 |                 |
| <i>d</i>             | 4.2985(5)       | 4.3990(5)       | 4.3811(4)       | 4.3463(5)       | 4.4054(5)       | 4.3144(5)       | 4.4341(4)       |
| $\varphi$            | 129.180(7)      | 127.541(5)      | 130.321(7)      | 126.789(5)      | 128.935(7)      | 129.166(6)      | 127.796(6)      |
| <i>d<sub>K</sub></i> | 5.0268(6)       | 5.0547(4)       | 4.9790(6)       | 5.0865(6)       | 5.0277(6)       | 5.0086(5)       | 5.0464(6)       |
| $\varphi_K$          | 50.474(7)       | 52.000(6)       | 51.590(6)       | 50.895(7)       | 52.073(5)       | 50.817(7)       | 52.231(5)       |
| <i>dev</i>           | -0.0819913      | 0.00050703      | 0.085127        | -0.029364       | -0.088673       | 0.092489        | 0.021827        |
|                      | (10)            | (15)            | (10)            | (3)             | (10)            | (11)            | (3)             |
| $\tau$               | 10.0008(15)     | 3.7381(6)       | 7.5981 (12)     | 11.4532(19)     | 7.4648(12)      | 11.0313(16)     | 8.2194(13)      |
| $\tau_i$             | -68.381(6)      | -68.695(8)      | -61.310(4)      | 67.860(6)       | -65.368(6)      | -64.303(8)      | -58.942(7)      |
| <i>C</i>             | <i>gg</i>       | <i>gg</i>       | <i>gg</i>       | <i>gt</i>       | <i>gg</i>       | <i>gg</i>       | <i>gg</i>       |

**Table S3.** Conformational characteristics of the DM- $\beta$ -CD host molecule in the PN/DM- $\beta$ -CD structure.

| Glucose unit         | ( <i>n</i> = 1) | ( <i>n</i> = 2) | ( <i>n</i> = 3) | ( <i>n</i> = 4) | ( <i>n</i> = 5) | ( <i>n</i> = 6) | ( <i>n</i> = 7)          |
|----------------------|-----------------|-----------------|-----------------|-----------------|-----------------|-----------------|--------------------------|
| <i>d</i>             | 4.3473(8)       | 4.3942(10)      | 4.3587(7)       | 4.4266(7)       | 4.3731(9)       | 4.2941(8)       | 4.4445(6)                |
| $\varphi$            | 129.144(11)     | 127.373(12)     | 128.276(11)     | 128.316(11)     | 129.989(10)     | 126.278(12)     | 129.536(10)              |
| <i>d<sub>K</sub></i> | 4.9832(10)      | 5.0834(7)       | 5.0718(8)       | 5.0231(11)      | 4.9889(9)       | 5.1185(7)       | 5.0075(10)               |
| $\varphi_K$          | 51.159(11)      | 51.279(12)      | 51.157(11)      | 52.478(12)      | 51.254(11)      | 50.169(11)      | 52.828(12)               |
| <i>dev</i>           | 0.22027         | -0.094344       | -0.132031       | 0.110000        | 0.109923        | -0.16698        | -0.046837                |
|                      | (3)             | (12)            | (17)            | (14)            | (14)            | (2)             | (6)                      |
| $\tau$               | +9.8121(15)     | +9.0032(14)     | +23.329(4)      | +14.060(3)      | +10.945(3)      | +8.2702(5)      | +23.2098(7)              |
| $\pi$                | -70.635(10)     | -67.784(12)     | 68.062(11)      | -63.526(13)     | -64.810(15)     | -74.383(15)     | -74.956(12)<br>62.522(9) |
| C                    | gg              | gg              | gt              | gg              | gg              | gg              | gg<br>gt                 |

**Table S4.** Conformational characteristics of the two TM- $\beta$ -CD host molecules in the PN/TM- $\beta$ -CD structure.

| Glucose unit         | ( <i>n</i> = 1) | ( <i>n</i> = 2) | ( <i>n</i> = 3) | ( <i>n</i> = 4) | ( <i>n</i> = 5) | ( <i>n</i> = 6) | ( <i>n</i> = 7) |
|----------------------|-----------------|-----------------|-----------------|-----------------|-----------------|-----------------|-----------------|
| <b>Host A</b>        |                 |                 |                 |                 |                 |                 |                 |
| <i>d</i>             | 4.2633(3)       | 4.3022(2)       | 4.5493(3)       | 4.3817(2)       | 4.2223(3)       | 4.4336(3)       | 4.4160(3)       |
| $\varphi$            | 118.3478(14)    | 120.555(4)      | 137.856(3)      | 127.560(2)      | 120.821(4)      | 123.5621(9)     | 141.947(3)      |
| <i>d<sub>K</sub></i> | 5.2952(3)       | 5.2834(3)       | 4.5786(3)       | 4.9028(3)       | 5.3870(4)       | 5.0298(2)       | 4.3622(3)       |
| $\varphi_K$          | 47.533(4)       | 51.1182(5)      | 57.224(5)       | 50.136(2)       | 47.672(3)       | 55.792(3)       | 53.3640         |
|                      |                 |                 |                 |                 |                 |                 | (19)            |
| <i>dev</i>           | -0.240455       | 0.57472         | -0.045129       | -0.47315        | 0.189997        | 0.47408         | -0.48006        |
|                      | (16)            | (4)             | (4)             | (3)             | (13)            | (3)             | (3)             |
| $\tau$               | -14.6415        | +41.661         | +35.710         | -9.3716         | +12.7837        | +24.0637        | +43.631         |
|                      | (13)            | (4)             | (3)             | (8)             | (11)            | (18)            | (3)             |
| $\pi$                | -81.523(4)      | -67.492(2)      | 73.5725         | -66.665(4)      | 73.0633(16)     | -72.913(5)      | 55.883(3)       |
|                      | 64.8896(18)     |                 | (10)            |                 |                 |                 | -79.410(2)      |
| C                    | gg              |                 |                 |                 |                 |                 | gt              |
|                      | gt              | gg              | gt              | gg              | gt              | gg              | gg              |

| Host B      |             |                         |             |                               |            |            |                  |
|-------------|-------------|-------------------------|-------------|-------------------------------|------------|------------|------------------|
| $d$         | 4.2850(3)   | 4.4461(3)               | 4.2435(3)   | 4.1902(2)                     | 4.4959(3)  | 4.5081(2)  | 4.2004(3)        |
| $\varphi$   | 114.3155(7) | 139.544(3)              | 130.8004(9) | 114.720(4)                    | 132.534(3) | 132.091(2) | 126.245(4)       |
| $d_K$       | 5.3900(3)   | 4.3776(3)               | 4.7664(3)   | 5.4501(3)                     | 4.8580(3)  | 4.6181(2)  | 5.1408(3)        |
| $\varphi_K$ | 50.681(3)   | 57.999(2)               | 48.517(4)   | 47.5417(5)                    | 56.579(5)  | 54.709(2)  | 46.893(3)        |
| $dev$       | 0.41535     | -0.58164                | -0.098670   | 0.54499                       | -0.130854  | -0.43059   | 0.281422         |
|             | (3)         | (4)                     | (8)         | (4)                           | (9)        | (3)        | (19)             |
| $\tau$      | +31.410     | +36.246                 | -24.504     | +39.326                       | +28.244    | -6.9941    | +14.5944         |
|             | (2)         | (2)                     | (2)         | (3)                           | (2)        | (6)        | (13)             |
| $\pi$       | -75.403(5)  | -76.599(3)<br>86.153(4) | -78.911(3)  | 78.903(4)<br>-41.9868<br>(12) | -59.392(3) | -63.146(5) | -71.4223<br>(16) |
| C           | gg          | gg<br>gt                | gg          | gt<br>gg                      | gg         | gg         | gg               |

$d$  = O4 $n$ ...O4( $n$ +1) distances;

$\varphi$  = O4( $n$ -1)...O4 $n$  ... O4( $n$ +1) angles;

$d_K$  = distances of the approximate center K of the O4 $n$  heptagon from the O4 $n$  atoms;

$\varphi_K$  = O4 $n$ ... K...O4( $n$ +1) angle;

$dev$  = deviations of the O-4 $n$  atoms from their least-squares plane;

$\tau$  = tilt angles between the optimum O4 $n$  plane and the mean plane atoms O4( $n$ -1), C1 $n$ , C4 $n$ , O4 $n$ ;

$\pi$  = O5 $n$ -C5 $n$ -C6 $n$ -O6 $n$  torsion angles;

C = conformation of the primary methoxy groups

All distances are given in Å and angles in (°).

**Table S5.** H bond analysis for the two encapsulated PN molecules (PN\_1 and PN\_2) in their complex with four  $\beta$ -CDs during the 12 ns MD simulation.

| Acceptor | Donor H    | Donor     | Frames | Fraction | Avg. Distance | Avg. Angle |
|----------|------------|-----------|--------|----------|---------------|------------|
| PN_1@O1  | 4GA_27@H6O | 4GA_27@O6 | 1162   | 0.0974   | 2.7356        | 161.9263   |
| PN_1@O1  | 4GA_24@H6O | 4GA_24@O6 | 949    | 0.0795   | 2.7436        | 162.7801   |
| PN_1@O1  | 4GA_26@H6O | 4GA_26@O6 | 897    | 0.0752   | 2.7559        | 163.7480   |
| PN_1@O1  | 4GA_25@H6O | 4GA_25@O6 | 520    | 0.0436   | 2.7341        | 161.0260   |
| PN_1@O1  | 4GA_18@H6O | 4GA_18@O6 | 249    | 0.0209   | 2.7544        | 161.6698   |
| PN_1@O1  | 4GA_23@H6O | 4GA_23@O6 | 234    | 0.0196   | 2.7650        | 161.2424   |
| PN_1@O1  | 4GA_19@H6O | 4GA_19@O6 | 51     | 0.0043   | 2.8471        | 155.0095   |
| PN_1@O3  | 4GA_16@H2O | 4GA_16@O2 | 20     | 0.0017   | 2.9227        | 151.3817   |
| PN_1@O3  | 4GA_20@H3O | 4GA_20@O3 | 16     | 0.0013   | 2.8907        | 147.9467   |
| PN_1@O3  | 4GA_18@H2O | 4GA_18@O2 | 11     | 0.0009   | 2.8865        | 151.1731   |
| PN_1@O2  | 4GA_15@H6O | 4GA_15@O6 | 6      | 0.0005   | 2.8191        | 152.5074   |
| PN_1@O2  | 4GA_15@H3O | 4GA_15@O3 | 4      | 0.0003   | 2.8763        | 144.5483   |
| PN_1@O2  | 4GA_20@H3O | 4GA_20@O3 | 2      | 0.0002   | 2.9269        | 160.3391   |
| PN_1@O3  | 4GA_17@H2O | 4GA_17@O2 | 1      | 0.0001   | 2.9866        | 138.4496   |
| PN_2@O1  | 4GA_10@H6O | 4GA_10@O6 | 987    | 0.0827   | 2.7449        | 163.3364   |
| PN_2@O1  | 4GA_4@H6O  | 4GA_4@O6  | 563    | 0.0472   | 2.7603        | 157.9697   |
| PN_2@O1  | 4GA_9@H6O  | 4GA_9@O6  | 356    | 0.0298   | 2.7420        | 162.8458   |
| PN_2@O1  | 4GA_12@H6O | 4GA_12@O6 | 53     | 0.0044   | 2.7568        | 162.1470   |
| PN_2@O3  | 4GA_4@H6O  | 4GA_4@O2  | 21     | 0.0018   | 2.8796        | 150.9538   |
| PN_2@O3  | 4GA_3@H6O  | 4GA_3@O2  | 15     | 0.0013   | 2.8895        | 149.6184   |
| PN_2@O1  | 4GA_8@H6O  | 4GA_8@O6  | 11     | 0.0009   | 2.8139        | 162.9386   |
| PN_2@O3  | 4GA_6@H6O  | 4GA_6@O3  | 9      | 0.0008   | 2.8485        | 148.4055   |
| PN_2@O2  | 4GA_1@H6O  | 4GA_1@O6  | 9      | 0.0008   | 2.8752        | 156.8046   |
| PN_2@O3  | 4GA_2@H6O  | 4GA_2@O2  | 6      | 0.0005   | 2.8865        | 151.2473   |
| PN_2@O1  | 4GA_11@H6O | 4GA_11@O6 | 2      | 0.0002   | 2.6996        | 150.0678   |
| PN_2@O2  | 4GA_7@H6O  | 4GA_7@O2  | 1      | 0.0001   | 2.8591        | 141.4388   |
| PN_2@O3  | 4GA_3@H6O  | 4GA_3@O3  | 1      | 0.0001   | 2.9679        | 148.9800   |
